# Supplementary material for: Prognostic Value and Clinicopathological Significance of p-stat3 Among Gastric Carcinoma Patients: A Systematic Review and Meta-Analysis
Source: PubMed Central journal article supplement — Medicine (Baltimore). 2016 Feb 8;95(5):e2641. doi: 10.1097/MD.0000000000002641 (PMC4748898; doi:10.1097/md.0000000000002641), 2016-02-08
Supplement: medi-95-e2641-s001.pdf [file medi-95-e2641-s001.pdf]

**Supplemental Figure 1** Forest plots of odds ratios (OR). (A) OR for the association of p-stat3 expression and TNM stage in gastric carcinoma patients; (B) OR for the association of p-stat3 expression and Lauren's classification in gastric carcinoma patients, (C) OR for the association of p-stat3 expression and gender in gastric carcinoma patients.

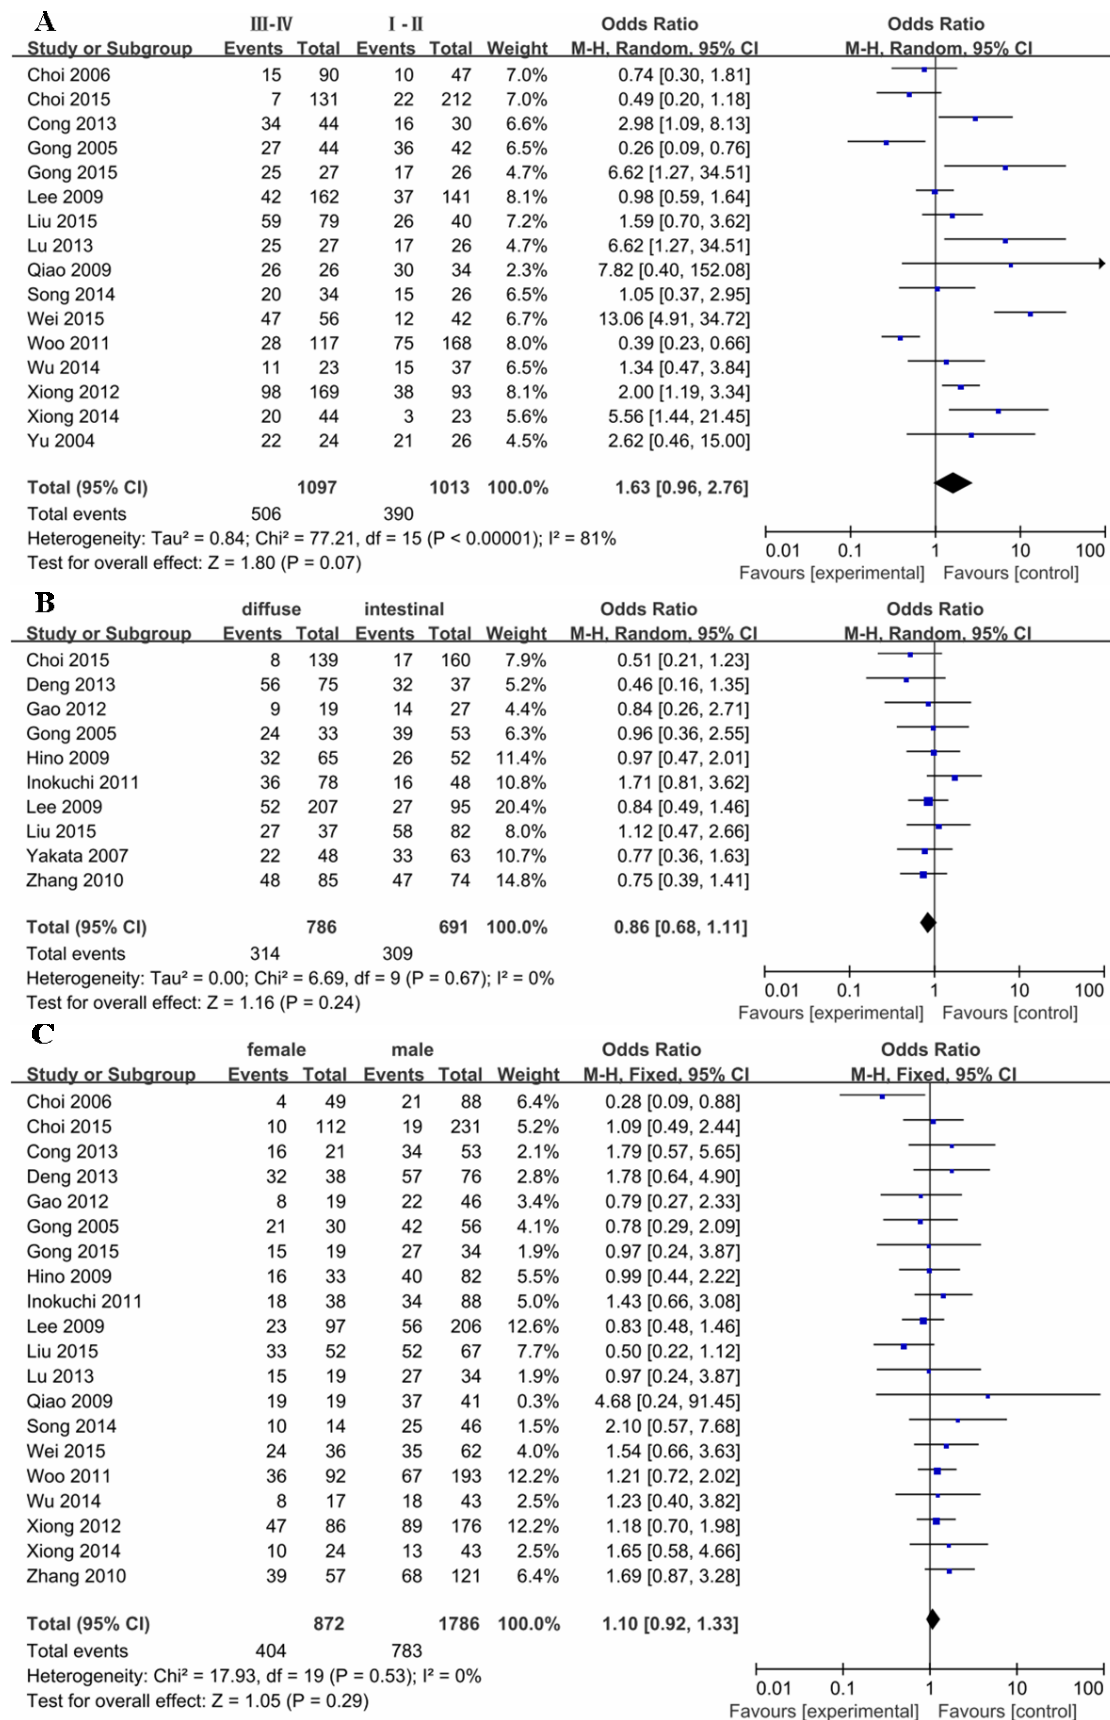

**Supplemental Figure 2** Filled funnel plot with pseudo 95% confidence limits. (A) Combined estimates for the association between p-stat3 expression and lymph node metastasis after trim-fill treatment; (B) Combined estimates for the association between p-stat3 expression and tumor differentiation after trim-fill treatment.

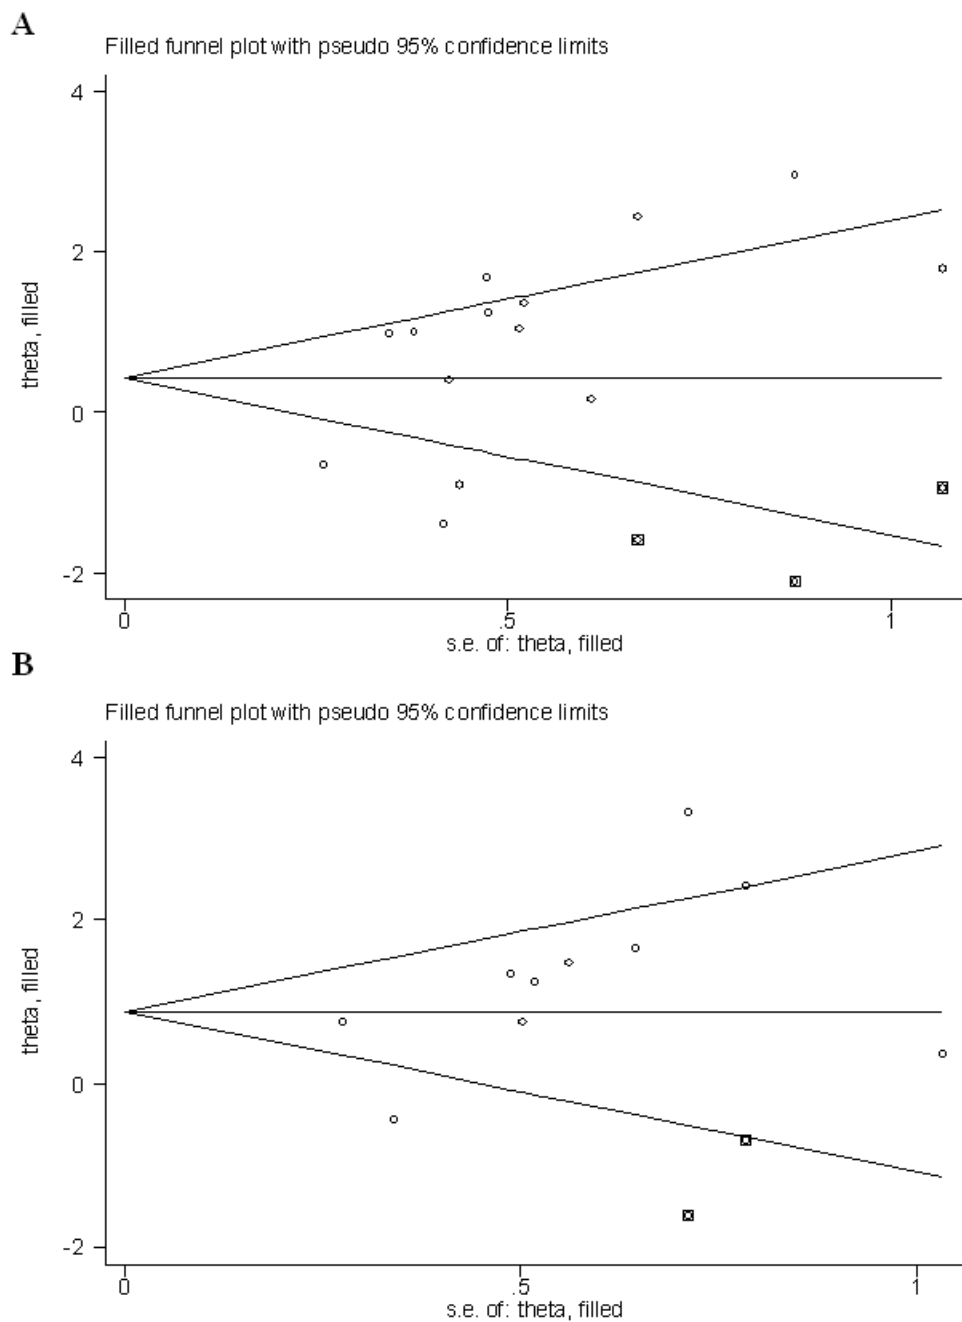

**Supplemental Table 1 Sensitivity analysis for p-stat3 expression with overall survival**

| Study omitted | HR (95% CI)       |
|---------------|-------------------|
| Deng 2010     | 1.85 [1.42, 2.40] |
| Deng 2013     | 1.98 [1.42, 2.76] |
| Gong 2005     | 2.00 [1.45, 2.77] |
| Inokuchi 2011 | 2.03 [1.46, 2.81] |
| Lee 2009      | 2.12 [1.50, 2.99] |
| Liu 2015      | 1.95 [1.41, 2.71] |
| Song 2014     | 1.98 [1.42, 2.75] |
| Woo 2011      | 2.19 [1.75, 2.73] |
| Wu 2014       | 2.05 [1.49, 2.82] |
| Xiong 2012    | 2.03 [1.41, 2.92] |
| Yakata 2007   | 2.03 [1.47, 2.80] |
| Combined      | 2.02 [1.49, 2.73] |

**Supplemental Table 2 Sensitivity analysis for p-stat3 expression with tumor differentiation**

| Study omitted | OR (95% CI)       |
|---------------|-------------------|
| Choi 2006     | 3.60 [1.84, 7.03] |
| Cong 2013     | 3.02 [1.71, 5.34] |
| Gong 2015     | 3.38 [1.78, 6.40] |
| Liu 2015      | 3.76 [1.89, 7.52] |
| Lu 2013       | 3.38 [1.78, 6.40] |
| Qiao 2009     | 3.93 [2.04, 7.58] |
| Song 2014     | 3.66 [1.85, 7.23] |
| Wei 2015      | 3.73 [1.86, 7.45] |
| Xiong 2012    | 4.08 [1.92, 8.67] |
| Yakata 2007   | 3.98 [1.98, 7.97] |
| Zhang 2010    | 4.42 [2.66, 7.33] |
| Combined      | 3.70 [1.98, 6.93] |

**Supplemental Table 3 Sensitivity analysis for p-stat3 expression with lymph node metastasis**

| Study omitted | OR (95% CI)       |
|---------------|-------------------|
| Choi 2015     | 2.75 [1.44, 5.23] |
| Cong 2013     | 2.32 [1.20, 4.50] |
| Deng 2013     | 2.34 [1.20, 4.56] |
| Gao 2012      | 2.53 [1.30, 4.92] |
| Gong 2015     | 2.13 [1.14, 3.99] |
| Hino 2009     | 2.82 [1.54, 5.17] |
| Inokuchi 2011 | 2.40 [1.21, 4.74] |
| Liu 2015      | 2.51 [1.27, 4.97] |
| Lu 2013       | 2.13 [1.14, 3.99] |
| Qiao 2009     | 2.30 [1.21, 4.39] |
| Song 2014     | 2.15 [1.14, 4.04] |
| Wei 2015      | 2.38 [1.22, 4.64] |
| Woo 2011      | 2.71 [1.44, 5.10] |
| Yakata 2007   | 2.25 [1.17, 4.31] |
| Zhang 2010    | 2.40 [1.21, 4.77] |
| Combined      | 2.40 [1.28, 4.50] |

**Supplemental Table 4** Explore the source of publication bias for p-stat3 expression with lymph node metastasis by omitting studies one by one.

| Study omitted | <i>P</i> value |
|---------------|----------------|
| Choi 2015     | 0.009          |
| Cong 2013     | 0.018          |
| Deng 2013     | 0.016          |
| Gao 2012      | 0.01           |
| Gong 2015     | 0.029          |
| Hino 2009     | 0.005          |
| Inokuchi 2011 | 0.01           |
| Liu 2015      | 0.016          |
| Lu 2013       | 0.029          |
| Qiao 2009     | 0.012          |
| Song 2014     | 0.025          |
| Wei 2015      | 0.017          |
| Woo 2011      | 0.083          |
| Yakata 2007   | 0.014          |
| Zhang 2010    | 0.007          |
